# Supplementary material
Source: HighWire-hosted journal article supplement (https://www.cmajopen.ca/highwire/filestream/87652/field_highwire_adjunct_files/1/open-2021-0043-original-submission.pdf)
Supplement: open-2021-0043-original-submission.pdf [file open-2021-0043-original-submission.pdf]

## When enrolment with a primary care provider is voluntary, who gets enrolled? Cross-sectional analysis of population-based data in two Canadian provinces

**Authors:** M. Ruth Lavergne PhD,<sup>1</sup> Caroline King BSc,<sup>2</sup> Sandra Peterson MSc,<sup>3</sup> Leora Simon MSc,<sup>3</sup> Catherine Hudon MD, PhD,<sup>4</sup> Christine Loignon PhD,<sup>5</sup> Rita McCracken MD PhD,<sup>6,7</sup> Austyn Brackett,<sup>8</sup> Kim McGrail PhD,<sup>3</sup> Erin Strumpf PhD<sup>2,9</sup> on behalf of the QC-BC Patient Enrolment Project Team

1. Faculty of Health Sciences, Simon Fraser University
2. Epidemiology, Biostatistics and Occupational Health, McGill University
3. Centre for Health Services and Policy Research, University of British Columbia
4. Department of Family Medicine and Emergency Medicine, Université de Sherbrooke
5. Faculty of Medicine and Health Sciences, Université de Sherbrooke
6. Department of Family Practice, University of British Columbia
7. Department of Family Medicine, Providence Health Care
8. Patient Voices Network, British Columbia
9. Department of Economics, McGill University

**Corresponding author:** M. Ruth Lavergne, ruth\_lavergne@sfu.ca

**Funding statement:** This study was funded by the Canadian Institutes for Health Research (CIHR) Strategy for Patient Oriented Research (SPOR) Network in Primary and Integrated Health Care Innovations (PIHCI) (CIHR HCI 150578), the Michael Smith Foundation for Health Research (MSFHR 17268), McGill University, Réseau-1 Québec, Québec Ministère de la Santé et des Services Sociaux and Université de Sherbrooke: Centre Recherche – Hôpital Charles Le Moyne. In-kind support was provided by the University of British Columbia and Institut de recherche en santé publique de l'Université de Montréal (IRSPUM). Ruth Lavergne is supported by a Michael Smith Foundation for Health Research Scholar Award and Erin Strumpf by a William Dawson Scholar Award from McGill University.

**Declaration of authors competing interests:** The authors have no competing interests to disclose.

**Contributors statement:** Ruth Lavergne conceived of the paper, oversaw analysis across provinces, and led drafting of the manuscript. Caroline King completed analysis in Quebec. Sandra Peterson completed analysis in British Columbia. All authors, including Leora Simon, Catherine Hudon, Christine Loignon, Rita McCracken, Austyn Brackett, Kim McGrail, and Erin Strumpf contributed to planning analysis, critical interpretation of findings, and approved the final manuscript. Erin Strumpf oversaw the project. The manuscript is submitted on behalf of the QC-BC Patient Enrolment Project Team.

**Abstract word count:** 249

**Word count:** 2,527

**Tables:** 6

**Figures:** 1

**Abstract**

**Background:** Quebec and British Columbia encouraged patient enrolment with a primary care provider through a range of voluntary programs, some targeted at seniors or people with chronic conditions, others open to the general population. Equity implications of voluntary enrolment programs warrant attention but have not been thoroughly explored.

**Methods:** We used linked administrative data to compare the characteristics of people eligible for enrolment programs to the general population. We use logistic regression to compare enrolled people to people eligible but not enrolled with respect to neighbourhood income, rural/urban location of residence, treatment for mental health and substance use, and pre-enrolment health care use, controlling for characteristics linked to program eligibility.

**Results:** Odds of enrolment were higher in higher income neighbourhoods for general programs (adjusted odds ratios and 95% confidence intervals comparing highest to lowest quintiles: 1.21 (1.20-1.23), 1.67 (1.64-1.69). Odds of enrolment were similar across neighbourhood income quintiles for targeted programs (0.95 (0.94-0.96), 1.03 (1.00-1.07), 1.10 (1.04-1.17)). Odds of enrolment by urban-rural location varied. People who received services for substance use had lower odds of enrolment in all programs (AORs ranged from 0.60 (0.58-0.63) to 0.72 (0.65-0.80)). People enrolled had similar or higher longitudinal continuity and numbers of primary care visits prior to enrollment, compared to people who were eligible but not enrolled.

**Interpretation:** Voluntary enrolment programs open to the general population may exacerbate inequities in access. If policies aim to promote equity in primary care access, programs should include criteria that reflect health status or prioritize underserved populations.

**Keywords:** primary care; enrolment; equity; access, continuity of care

## Introduction

A longitudinal relationship between patients and providers is central to continuity and coordination of primary care (1, 2). Formal enrolment (also called “rostering” or “empanelment”) is a feature of high-performing primary care (3). In some systems, especially those with capitated payments, patient enrolment with providers or places of care is unambiguous to patients, providers, and payors/system administrators (4-6). Under fee-for-service payment, the absence of a clear patient panel may make proactive prevention and chronic disease management more challenging, may limit potential for quality improvement and accountability measures (3, 7), and may contribute to people seeking care from walk-in clinics and emergency departments (8). Patient enrolment policies have been implemented in various Canadian provincial health care systems, with implicit goals of improving access to and continuity of primary care.

Enrolment policies also have potential to improve equity in access to primary care, particularly as barriers to primary care have been observed by income (9, 10), rural/urban context (11), and among people with mental illness and substance use (12-14). Ideally, continuous relationships over time allow primary care providers to understand the contexts in which their patients live, and respond more effectively to the needs of people who are economically or socially marginalized (15-17). As risk of developing chronic conditions is associated with socioeconomic status (18, 19), enrolment programs targeting patients with chronic conditions may improve access among people with lower socioeconomic status. On the other hand, enrollment programs without specific criteria may compound preferential access to primary care already observed among people with higher socioeconomic status (20). In the context of a fixed payment per patient, providers have incentives to select healthier patients who will require less time (21, 22). A study of the characteristics of people enrolled through the centralized waiting list for a primary care physician in Quebec found that although payments were higher for enrolling vulnerable patients (based on the presence of various chronic health conditions), most people enrolled through this mechanism were healthy individuals (23, 24). The equity implications of voluntary enrolment policies warrant attention but have not been thoroughly explored.

Quebec (QC) and British Columbia (BC) both have fee-for-service payment systems and have implemented programs that in some way formalize connections between patients and primary care physicians, documented through the billing of specific fee codes to provincial insurers. These “enrolment” programs differ with respect to population(s) eligible (targeted by age/chronic conditions vs general), requirements of enrolment, and payment mechanisms (Table 1), but all are voluntary in that providers choose whether they want to participate in programs and which people they bill codes for. This creates an opportunity to study who is enrolled under different approaches. We used administrative health data to compare the characteristics of enrolled people and people who were eligible but not enrolled, examining differences in enrolment by neighbourhood income, rural/urban location of residence, treatment for mental health and substance use, and pre-enrolment health care use.

[Table 1]

## Methods

### *Data sources*

Administrative databases were accessed and housed separately within provinces, though measures and analysis were the same. We used databases maintained by the QC Ministry of Health and Social Services and the provincial health insurer (provided through the National Institute for Excellence in Health and Social Services) and the BC Ministry of Health (provided through Population Data BC) (25-28). Data were linked within provinces using unique anonymous person-level study identifiers for patients and physicians and cover up to 15 years of service use (2001-2015). In both provinces, data include the demographic and socioeconomic characteristics of people registered for provincial health insurance programs, payments for physician services, and of hospital stays and emergency department visits. Primary care services delivered are captured in claims data, which contain the date of service, amount paid, an ICD code associated with the billing record, and unique identifiers for both the patient and physician.

**Population**

The study population included people registered for health insurance for >75% of days in the two years before and two years after policy implementation, who were age 40 and older (ages more likely to use primary care regularly), and who met eligibility criteria for each program (based on diagnosis codes in physician and hospital records) in the year prior to implementation of each program (Appendix 1). We excluded people with missing age or sex, with a recorded age over 120 years, or who used services that indicated they were residents of a long-term care facility. For each enrolment program, the intervention (enrolled) population includes people who had a billing record indicating enrolment within the first two years of program implementation, and the comparison (eligible but not enrolled) who were not enrolled within the first two years. More details on criteria specific to each program are included in Table 2.

[Table 2]

**Measures**

All measures of patient characteristics were captured prior to program implementation and patient enrolment. Patient age and sex are collected at time of registration for provincial insurance programs. The field is labeled “gender” in BC and “sex” in QC. In both cases only binary “male” and “female” options are provided. We used the Elixhauser index to count the number of comorbid conditions. We used the census enumeration area of the patient’s residence to assign neighbourhood income quintile and to classify residence by rurality, using the Statistics Canada SACTYPE metropolitan influences zones (29). We collapsed categories to compare census metropolitan areas (labelled “Metropolitan”), census agglomerations and areas with strong metropolitan influence (labelled “Smaller urban”), and areas with moderate to no metropolitan influence (labelled “Rural/remote”). We identified people who received services for mental health (ICD9 295-302, 306-319, 50B (BC only); ICD-10-CA: F20-F99, excluding F55) or substance use (ICD9: 291, 292, 303-305, 980; ICD10: F10-F16, F18-F19 and T51 based on service use in the year prior to program implementation (one hospitalization or two physician claims for mental health, one hospitalization or physician claim for substance use).

We counted the number of ambulatory physician visits with a primary care physician in the year prior to program implementation as well as emergency department visits. Ambulatory visits were based on unique physician/patient/date combinations with a claim specialty of primary care, that occurred in an office, home or other ambulatory location (excluding hospital, ED, long-term care) and excluding laboratory claims and diagnostics. We measured longitudinal

continuity of care as the proportion of primary care visits from the physician seen most often (usual provider continuity, UPC).

### ***Statistical analysis***

We present descriptive statistics and associated standardized differences comparing age, sex, chronic health conditions, income, urban-rural residence, service use for mental health and substance use. We compare patients eligible for the programs to the entire provincial population (age 40+) to understand equity implications of how the programs are targeted. We also compare people enrolled and people who were eligible but not enrolled to understand equity implications in access to the programs.

We constructed logistic regression models for each enrolment program separately estimating odds of enrolment by variables unrelated to program eligibility: income, rurality, service use for mental health and substance use, and previous health care use. We present bivariable (unadjusted) and multivariable odds ratios adjusted for patient age, sex, and number of comorbidities.

***Ethics approval:*** Our project was reviewed and approved by the research ethics boards at McGill University (IRB study number A05-B33-17B), the University of British Columbia/ Simon Fraser University (harmonized board, REB number H17-01497) and Sherbrooke University (N/Réf. 2017-1655/Strumpf).

## **Results**

### ***Comparison of people eligible for enrolment programs with the general population***

Targeted programs (Vulnerable enrolment in QC, Chronic disease incentive and Complex care incentive in BC) require that people enrolled have specific health conditions. As expected, people eligible for targeted programs were older, had a higher average number of comorbidities, and lived in lower income neighbourhoods compared to the general population (Tables 3 and 4). They also had more primary care and ED visits and higher longitudinal continuity prior to enrolment than the general population (Tables 3 and 4). Slightly higher percentages of people living outside of metropolitan areas were eligible for targeted programs.

In Quebec, the population eligible for general enrolment in 2009 did not include people previously eligible under the targeted program. As a result, the eligible population is somewhat younger and has fewer comorbidities. Analysis of “A GP for Me” in BC was based on patients virtually rostered to each physician as usual provider of care. We limited this analysis to people with three or more primary care visits for more reliable assignment. The study population is therefore older and has more comorbidities than the general population, though all physicians were eligible to enrol in “A GP for Me” (Table 4).

[Tables 3 and 4]

### ***Comparison of enrolled people with people who were eligible but not enrolled***

#### ***Neighbourhood income quintile and income assistance***

Differences in enrollment across income quintiles were small in targeted programs (standardized differences  $\leq 0.03$ ) and larger in general enrolment programs (standardized differences 0.074 in QC, 0.20 in BC) (Tables 3 and 4). After adjustment for factors that directly

1  
2  
3  
4  
5  
6  
7  
8  
9  
10  
11  
12  
13  
14  
15  
16  
17  
18  
19  
20  
21  
22  
23  
24  
25  
26  
27  
28  
29  
30  
31  
32  
33  
34  
35  
36  
37  
38  
39  
40  
41  
42  
43  
44  
45  
46  
47  
48  
49  
50  
51  
52  
53  
54  
55  
56  
57  
58  
59  
60

determined eligibility, Figure 1 shows that income gradients in enrolment are observed, with people living in higher income neighbourhoods generally more likely to be enrolled. However, the magnitude of differences across income quintiles was more pronounced for general than targeted programs. The exception is the Quebec “vulnerable” (targeted) enrolment program, where odds of enrollment among people who lived in the highest income neighbourhoods were somewhat lower than those in the lowest (Adjusted Odds Ratio (AOR): 0.95, 95% CI: 0.94-0.96) (Table 5, Figure 1).

Within BC we were also able to identify people whose prescription coverage indicates they are on income assistance (which suggests lower income) and others. Within targeted programs there was no difference in adjusted odds of enrollment between people whose prescription coverage indicates they are on income assistance and others. In the general enrolment program people whose prescription coverage indicates they are on social assistance (which suggests lower income) had lower odds of enrollment (AOR 0.76, 95% CI: 0.75-0.78).

[Table 5 and Figure 1]

*Urban-rural residence*

There was no consistent pattern of enrolment by rurality of residence. In the Quebec targeted enrolment program odds of enrolment were higher among people outside metropolitan areas, while the reverse was true for the general program. In the BC targeted programs people who live in smaller urban areas were more likely to be enrolled than people who live in metropolitan centres, while people in rural/remote areas had lower odds of enrolment. In the BC general program people in both smaller urban and rural/remote areas had higher odds of having a primary care provider who participated in the attachment initiative.

*Mental health and substance use*

Odds of enrolment among people who received services for mental health were somewhat lower than those who did not (AOR 0.87-0.98). The exception was BC’s general enrolment program (AOR 1.14, 95% CI: 1.13-1.16). People who received services for substance use had consistently and markedly lower odds of enrolment, across all programs (AOR 0.60-0.73).

*Health care use in the year prior to enrolment programs*

In Quebec people with more primary care visits in the year before program introduction were more likely to be enrolled (AOR 1.03-1.06) (Table 6). In BC odds of enrolment did not differ by primary care visits in the year prior to enrolment. For the Quebec “vulnerable” enrolment program, people with more emergency department (ED) visits in the year before program introduction were more likely to be enrolled (AOR 1.04, 95% CI: 1.04, 1.04). In all other programs, ED visits in the prior year were not associated with odds of enrolment. In both provinces people with higher longitudinal continuity in the year before program introduction had somewhat higher odds of being enrolled (AOR 1.02-1.13 per 10% change in continuity).

[Table 6]

**Interpretation**



Compared to the general population, we find that people eligible for targeted enrolment programs tend to live in lower income neighbourhoods, which was expected as income and chronic illness are correlated (18, 19). We do not observe differences in enrolment by income within targeted programs. In general programs, people who live in higher income neighbourhoods are significantly more likely to be enrolled. Odds of enrolment by urban-rural location varied. People who received services for mental health and substance use generally had lower odds of enrolment. People enrolled had similar or higher levels of primary care visits and longitudinal continuity prior to enrollment, compared to patients who were eligible but not enrolled.

Our findings with respect to neighbourhood income are similar to those reported by Olah et al. (2013) indicating that primary care physicians prefer to enrol patients who report higher socioeconomic status, even when financial status does not impact physician payment (30). That people who have been treated for mental health and substance use were less likely to be enrolled is consistent with literature documenting barriers to accessing primary care (12-14). We also observe that people enrolled tended to have similar or higher numbers of primary care visits and longitudinal continuity of care in the year prior to enrolment. This suggests that enrolment programs may formalize existing care relationships between patients and providers, and/or that presenting at a practice more often may increase the chance of enrollment.(31)

Differences in odds of enrollment between metropolitan and other areas are apparent across programs, though patterns vary. In BC, more physicians practice in walk-in clinics in metropolitan areas, perhaps shaping the observation of higher odds of participation in the attachment initiative outside of metropolitan areas. Other literature has also found higher use of primary care physician services in smaller urban areas, compared to both metropolitan and rural/remote settings. (11)

Our analysis is limited in several ways. First, to ensure a consistent time period across programs we examined people enrolled within the first two years following implementation. People enrolled in early years of program operation may differ from those enrolled later on. While we could measure neighbourhood income quintile in both provinces, in BC we could also observe if people received a prescription paid for by programs targeting people on social assistance. This provided an individual-level indicator of low-income status but is limited in that people need to have filled a prescription for us to observe this. We examined service use for mental health and/or substance use in the year prior to the policy. By using measures of treatment for mental health and substance use we are missing people who did not seek care and who may have the greatest need for primary care enrolment. Similarly, analysis of general enrolment in BC is limited to people with 3 or more visits, and who are therefore already accessing services. This was necessary to define the study population, and both the intervention and comparison population are consistent in this restriction. All of the programs examined involve the billing of a fee code, but patients may not have been aware of the programs. Our objective was not to evaluate the effect of enrolment programs on access or quality of care nor the relationship with accountability and patient management. These effects will be examined separately.

Policymakers should be aware that voluntary enrolment programs open to the general population may exacerbate inequities in access. We conclude that if policies aim to promote equity in primary care access, programs should include criteria that reflect health status or prioritize underserved populations.

1  
2  
3  
4  
5  
6  
7  
8  
9  
10  
11  
12  
13  
14  
15  
16  
17  
18  
19  
20  
21  
22  
23  
24  
25  
26  
27  
28  
29  
30  
31  
32  
33  
34  
35  
36  
37  
38  
39  
40  
41  
42  
43  
44  
45  
46  
47

**Table 1.** Description of enrolment programs in

|                                                  | Quebec                                                                                                                                                                         |                                                                                                                 | British Columbia                                                                                                     |                                      |                                                                                                                                                                   |
|--------------------------------------------------|--------------------------------------------------------------------------------------------------------------------------------------------------------------------------------|-----------------------------------------------------------------------------------------------------------------|----------------------------------------------------------------------------------------------------------------------|--------------------------------------|-------------------------------------------------------------------------------------------------------------------------------------------------------------------|
| Program                                          | Vulnerable Enrolment (2003)(32)                                                                                                                                                | General Enrolment (2009)(33)                                                                                    | Chronic disease incentive (2003)(28)                                                                                 | Complex care incentive (2007)(34)    | A GP for Me/Attachment initiative (2013)(35)                                                                                                                      |
| Physician responsibilities for enrolled patients | Formal enrolment between patient and physician through a signed contract. Physician agrees to take on the patient and ensure follow up of health problems on an ongoing basis. |                                                                                                                 | Physician bills code accepting responsibility for chronic disease management for one year                            |                                      | Physician bills code indicating willingness to provide “full-service family practice” and confirm relationship with patient through a “standardized conversation” |
| Population(s) eligible                           | Vulnerable patients (elderly or chronically ill – included conditions change over time)                                                                                        | General population – Anyone who did not meet the vulnerable criteria                                            | Patients with diabetes or CHF (at time of implementation in 2003, list of eligible conditions subsequently expanded) | Patients with 2+ eligible conditions | All primary care physicians and their patients                                                                                                                    |
| Annual payment amount per patient                | \$14-21, increases to \$35-75 in more recent years(36) (can be billed annually, varies based on practice setting), also enabled billing of additional fee codes.               | \$7-11 (can be billed annually, varies based on practice setting), also enabled billing of additional fee codes | \$75                                                                                                                 | \$315                                | \$0 opt in, but enabled billing of additional fee codes                                                                                                           |



**Table 2. Intervention/comparison populations used in analysis**

| Quebec                     |                                                                                                              |                             | British Columbia                                                                                                                                                      |                                                                                                                                                                                  |                                                |
|----------------------------|--------------------------------------------------------------------------------------------------------------|-----------------------------|-----------------------------------------------------------------------------------------------------------------------------------------------------------------------|----------------------------------------------------------------------------------------------------------------------------------------------------------------------------------|------------------------------------------------|
| Program                    | Vulnerable<br>Enrolment (2003)                                                                               | General<br>Enrolment (2009) | Chronic disease<br>incentive (2003)                                                                                                                                   | Complex<br>care<br>incentive<br>(2007)                                                                                                                                           | A GP for<br>Me/Attachment<br>initiative (2013) |
| Intervention<br>population | Patients for whom relevant billing codes were submitted within the first two years of program implementation |                             | Patients with qualifying chronic conditions in the year prior to the policy change for whom the relevant code was billed within the first two years of implementation | Patients who received the majority of their care from physicians who opted into the program. We restricted analysis to patients with 3+ visits so we could more clearly identify |                                                |
| Comparison<br>population   | Patients who were eligible but were not enrolled within the first two years of implementation                |                             | Patients with qualifying chronic conditions in the year prior to the policy change with no code billed within the first two years of implementation                   | Patients with 3 or more visits who received the majority of their care from a physician who did not opt in                                                                       |                                                |

1  
2  
3  
4  
5  
6  
7  
8  
9  
10  
11  
12  
13  
14  
15  
16  
17  
18  
19  
20  
21  
22  
23  
24  
25  
26  
27  
28  
29  
30  
31  
32  
33  
34  
35  
36  
37  
38  
39  
40  
41  
42  
43  
44  
45  
46  
47

**Table 3.** Comparison of the general population, patients enrolled, and patients eligible but not enrolled in the year prior to program implementation (Quebec)

| Variable                                               | QC<br>population<br>(age 40+)<br>2007 | Vulnerable enrolment (targeted)<br>2003 |                   |                            | General enrolment<br>2009 |                   |                            |
|--------------------------------------------------------|---------------------------------------|-----------------------------------------|-------------------|----------------------------|---------------------------|-------------------|----------------------------|
|                                                        |                                       | Enrolled                                | Not<br>enrolled   | Standardized<br>difference | Enrolled                  | Not<br>enrolled   | Standardized<br>difference |
| Total - N                                              | 4,043,955                             | 505,869                                 | 1,063,141         |                            | 352,380                   | 2,042,543         |                            |
| Demographics, comorbidities, and location of residence |                                       |                                         |                   |                            |                           |                   |                            |
| Age group - N (%)                                      |                                       |                                         |                   |                            |                           |                   |                            |
| 40-49 years old                                        | 1,399,458<br>(34.6)                   | 33,699<br>(6.7)                         | 253,701<br>(23.9) | -0.853                     | 143,111<br>(40.6)         | 946,807<br>(46.4) | -0.118                     |
| 50-59 years old                                        | 1,177,884<br>(29.2)                   | 68,075<br>(13.5)                        | 303,729<br>(28.6) |                            | 138,721<br>(39.4)         | 740,845<br>(36.3) |                            |
| 60-69 years old                                        | 785,691<br>(19.5)                     | 107,541<br>(21.3)                       | 259,932<br>(24.5) |                            | 70,552<br>(20)            | 354,827<br>(17.4) |                            |
| 70-79 years old                                        | 457,215<br>(11.3)                     | 218,163<br>(43.1)                       | 174,997<br>(16.5) |                            | n/a                       | n/a               |                            |
| 80+ years old                                          | 220,113<br>(5.5)                      | 78,391<br>(15.5)                        | 70,774<br>(6.7)   |                            | n/a                       | n/a               |                            |
| Sex - N (%)                                            |                                       |                                         |                   |                            |                           |                   |                            |
| Female                                                 | 2,079,367<br>(51.5)                   | 281,512<br>(55.7)                       | 603,040<br>(56.7) | -0.022                     | 195,164<br>(55.4)         | 957,321<br>(46.9) | -0.171                     |
| Comorbidity: # of Elixhauser categories - Mean (SD)    | 0.57<br>(0.87)                        | 1.26<br>(1.18)                          | 0.80<br>(1.00)    | 0.424                      | 0.29<br>(0.52)            | 0.22<br>(0.48)    | 0.143                      |
| Neighbourhood Income Quintile - N (%)                  |                                       |                                         |                   | -0.022                     |                           |                   | -0.074                     |
| Lowest income quintile                                 | 802,422<br>(20.4)                     | 108,911<br>(21.5)                       | 223,954<br>(21.1) |                            | 59,713<br>(17)            | 407,162<br>(19.9) |                            |
| 2nd income quintile                                    | 786,080<br>(20)                       | 103,836<br>(20.5)                       | 210,634<br>(19.8) |                            | 65,660<br>(18.6)          | 381,600<br>(18.7) |                            |
| Middle income quintile                                 | 781,599<br>(19.9)                     | 95,395<br>(18.9)                        | 196,445<br>(18.5) |                            | 72,634<br>(20.6)          | 384,663<br>(18.8) |                            |
| 4th income quintile                                    | 763,762<br>(19.4)                     | 93,118<br>(18.4)                        | 192,452<br>(18.1) |                            | 73,162<br>(20.8)          | 392,944<br>(19.2) |                            |
| Highest income quintile                                | 778,603<br>(19.8)                     | 88,794<br>(17.6)                        | 192,457<br>(18.1) |                            | 77,909<br>(22.1)          | 392,706<br>(19.2) |                            |
| Missing                                                |                                       | 3.13%                                   | 4.44%             |                            | 0.94%                     | 0.94%             |                            |

|                                                                           |                     |                   |                   |        |                   |                     |       |
|---------------------------------------------------------------------------|---------------------|-------------------|-------------------|--------|-------------------|---------------------|-------|
| Urban-rural residence - N (%)                                             |                     |                   |                   | -0.124 |                   | -0.077              |       |
| Metropolitan                                                              | 2,655,942<br>(67.2) | 298,494<br>(59.0) | 685,284<br>(64.5) |        | 252,526<br>(71.7) | 1,361,442<br>(66.7) |       |
| Smaller urban                                                             | 703,685<br>(17.9)   | 112,305<br>(22.2) | 180,674<br>(17)   |        | 51,286<br>(14.6)  | 341,448<br>(16.7)   |       |
| Rural                                                                     | 584,843<br>(14.9)   | 86,929<br>(17.2)  | 165,944<br>(15.6) |        | 46,765<br>(13.3)  | 269,430<br>(13.3)   |       |
| Missing                                                                   |                     | 1.45%             | 2.71%             |        | 0.48%             | 3.37%               |       |
| <b>Health care use in year prior to enrolment program</b>                 |                     |                   |                   |        |                   |                     |       |
| Service use for mental health - N (%)                                     | 52,357 (1.3)        | 10,667<br>(2.1)   | 33,934<br>(3.2)   | -0.067 | N/A               | N/A                 |       |
| Service use for substance use - N (%)                                     | 19,909 (0.5)        | 3,352<br>(0.7)    | 12,366<br>(1.2)   | -0.053 | N/A               | N/A                 |       |
| Primary care visits – mean (SD)                                           | 3.26 (5.48)         | 6.65<br>(7.46)    | 4.28<br>(5.85)    | 0.353  | 2.47<br>(2.65)    | 1.80<br>(2.73)      | 2.56  |
| ED visits – mean (SD)                                                     | 0.53 (1.69)         | 0.86<br>(2.14)    | 0.68<br>(1.99)    | 0.085  | 0.26<br>(0.84)    | 0.25<br>(0.87)      | 0.005 |
| Continuity (proportion of visits with usual provider of care) – mean (SD) | 0.59<br>(0.43)      | 0.59<br>(40.28)   | 0.38<br>(41.92)   | 0.522  | 0.44<br>(0.45)    | 0.25<br>(0.40)      | 0.443 |

We consider a standardized difference =0.2 be considered a 'small' effect size, 0.5 represents a 'medium' effect size and 0.8 a 'large' effect size.

1  
2  
3  
4  
5  
6  
7  
8  
9  
10  
11  
12  
13  
14  
15  
16  
17  
18  
19  
20  
21  
22  
23  
24  
25  
26  
27  
28  
29  
30  
31  
32  
33  
34  
35  
36  
37  
38  
39  
40  
41  
42  
43  
44  
45  
46  
47

**Table 4.** Comparison of the general population, patients enrolled, and patients eligible but not enrolled (British Columbia)

| Variable                                               | BC population<br>(age 40+, 2007) | Chronic disease incentive<br>(targeted) 2003 |                  |                            | Complex care<br>incentive (targeted) 2007 |                  |                            | A GP for Me/Attachment initiative<br>(general) 2013 |                   |                            |
|--------------------------------------------------------|----------------------------------|----------------------------------------------|------------------|----------------------------|-------------------------------------------|------------------|----------------------------|-----------------------------------------------------|-------------------|----------------------------|
|                                                        |                                  | Enrolled                                     | Not<br>enrolled  | Standardized<br>difference | Enrolled                                  | Not<br>enrolled  | Standardized<br>difference | Enrolled                                            | Not<br>enrolled   | Standardized<br>difference |
| Demographics, comorbidities, and location of residence |                                  |                                              |                  |                            |                                           |                  |                            |                                                     |                   |                            |
| Total - N (%)                                          | 1,953,390 (100.0)                | 60,764<br>(45.5)                             | 72,825<br>(54.5) |                            | 28,273<br>(59.4)                          | 19,346<br>(40.6) |                            | 1,066,714<br>(79.0)                                 | 282,714<br>(21.0) |                            |
| Age group - N (%)                                      |                                  |                                              |                  | 0.11                       |                                           |                  | 0.40                       |                                                     |                   | 0.16                       |
| 40-49 years old                                        | 636,535<br>(32.6)                | 6,693<br>(11.0)                              | 9,037<br>(12.4)  |                            | 790<br>(2.8)                              | 1,477<br>(7.6)   |                            | 221,202<br>(20.7)                                   | 72,390<br>(25.6)  |                            |
| 50-59 years old                                        | 584,379<br>(29.9)                | 14,342<br>(23.6)                             | 17,356<br>(23.8) |                            | 3,222<br>(11.4)                           | 3,584<br>(18.5)  |                            | 290,914<br>(27.3)                                   | 82,109<br>(29.0)  |                            |
| 60-69 years old                                        | 376,210<br>(19.3)                | 17,488<br>(28.8)                             | 19,244<br>(26.4) |                            | 7,089<br>(25.1)                           | 5,409<br>(28.0)  |                            | 276,542<br>(25.9)                                   | 68,406<br>(24.2)  |                            |
| 70-79 years old                                        | 235,635<br>(12.1)                | 16,023<br>(26.4)                             | 18,116<br>(24.9) |                            | 10,160<br>(35.9)                          | 5,745<br>(29.7)  |                            | 179,607<br>(16.8)                                   | 40,170<br>(14.2)  |                            |
| 80+ years old                                          | 120,631<br>(6.2)                 | 6,218<br>(10.2)                              | 9,072<br>(12.5)  |                            | 7,012<br>(24.8)                           | 3,131<br>(16.2)  |                            | 98,449<br>(9.2)                                     | 19,639<br>(6.9)   |                            |
| Sex - N(%)                                             |                                  |                                              |                  |                            |                                           |                  |                            |                                                     |                   |                            |
| Female                                                 | 1,011,075<br>(51.8)              | 27,454<br>(45.2)                             | 33,362<br>(45.8) | -0.01                      | 11,455<br>(40.5)                          | 8,393<br>(43.4)  | -0.06                      | 613,937<br>(57.6)                                   | 152,978<br>(54.1) | 0.07                       |
| Comorbidity: # of Elixhauser<br>categories - Mean (SD) | 0.88<br>(1.08)                   | 2.13<br>(1.25)                               | 2.15<br>(1.38)   | -0.02                      | 3.25<br>(1.66)                            | 2.89<br>(1.62)   | 0.22                       | 1.39<br>(1.26)                                      | 1.27<br>(1.21)    | 0.09                       |
| Neighbourhood Income Quintile<br>- N(%)                |                                  |                                              |                  | 0.03                       |                                           |                  | 0.03                       |                                                     |                   | 0.20                       |
| Lowest income quintile                                 | 368,926<br>(19.2)                | 13,952<br>(23.7)                             | 17,393<br>(24.8) |                            | 6,793<br>(24.3)                           | 4,850<br>(25.4)  |                            | 195,711<br>(18.5)                                   | 65,901<br>(23.5)  |                            |
| 2nd income quintile                                    | 374,503<br>(19.5)                | 12,654<br>(21.5)                             | 15,257<br>(21.7) |                            | 6,193<br>(22.1)                           | 4,293<br>(22.5)  |                            | 205,854<br>(19.5)                                   | 63,655<br>(22.7)  |                            |
| Middle income quintile                                 | 387,101<br>(20.1)                | 11,788<br>(20.1)                             | 13,716<br>(19.6) |                            | 5,488<br>(19.6)                           | 3,749<br>(19.6)  |                            | 212,035<br>(20.0)                                   | 54,539<br>(19.5)  |                            |
| 4th income quintile                                    | 391,346<br>(20.3)                | 10,632<br>(18.1)                             | 12,109<br>(17.3) |                            | 4,977<br>(17.8)                           | 3,352<br>(17.6)  |                            | 219,252<br>(20.7)                                   | 49,942<br>(17.8)  |                            |
| Highest income quintile                                | 402,447<br>(20.9)                | 9,732<br>(16.6)                              | 11,674<br>(16.6) |                            | 4,553<br>(16.3)                           | 2,848<br>(14.9)  |                            | 224,937<br>(21.3)                                   | 46,028<br>(16.4)  |                            |

|                                                                           |                     |                  |                  |       |                  |                  |       |                   |                   |       |
|---------------------------------------------------------------------------|---------------------|------------------|------------------|-------|------------------|------------------|-------|-------------------|-------------------|-------|
| Prescription drug coverage indicates income Assistance N (%)              | 66,911<br>(3.4)     | 4,054<br>(6.7)   | 4,873<br>(6.7)   | 0.00  | 2,038<br>(7.2)   | 1,707<br>(8.8)   | -0.06 | 52,147<br>(4.9)   | 18,278<br>(6.5)   | -0.07 |
| Urban-rural residence – N (%)                                             |                     |                  |                  | 0.12  |                  |                  | 0.19  |                   |                   | 0.42  |
| Metropolitan area                                                         | 1,275,866<br>(65.5) | 37,301<br>(61.5) | 45,415<br>(62.5) |       | 17,807<br>(63.0) | 12,285<br>(63.5) |       | 670,582<br>(62.9) | 228,827<br>(81.0) |       |
| Smaller urban                                                             | 449,767<br>(23.1)   | 17,308<br>(28.5) | 18,109<br>(24.9) |       | 7,830<br>(27.7)  | 4,196<br>(21.7)  |       | 278,942<br>(26.2) | 33,312<br>(11.8)  |       |
| Rural/remote                                                              | 221,884<br>(11.4)   | 6,049<br>(10.0)  | 9,161<br>(12.6)  |       | 2,630<br>(9.3)   | 2,858<br>(14.8)  |       | 116,952<br>(11.0) | 20,501<br>(7.3)   |       |
| <b>Health care use in year prior to enrolment program</b>                 |                     |                  |                  |       |                  |                  |       |                   |                   |       |
| Service use for mental health - N (%)                                     | 179,352<br>(9.2)    | 5,846<br>(9.6)   | 7,382<br>(10.1)  | -0.02 | 3,379<br>(12.0)  | 2,588<br>(13.4)  | -0.04 | 143,376<br>(13.4) | 33,874<br>(12.0)  | 0.04  |
| Service use for substance use - N (%)                                     | 23,538<br>(1.2)     | 582 (1.0)        | 1,029<br>(1.5)   | -0.04 | 551<br>(1.9)     | 597<br>(3.1)     | -0.07 | 18,671<br>(1.8)   | 8,077<br>(2.9)    | -0.07 |
| Primary care visits – mean (SD)                                           | 5.58<br>(7.02)      | 10.09<br>(7.91)  | 9.97<br>(8.58)   | 0.01  | 14.34<br>(10.17) | 12.69<br>(10.40) | 0.16  | 7.45<br>(6.48)    | 7.78<br>(8.11)    | -0.06 |
| ED visits – mean (SD)                                                     | 0.28<br>(1.06)      | 0.43<br>(1.30)   | 0.52<br>(1.34)   | -0.07 | 1.26<br>(2.32)   | 1.33<br>(2.59)   | -0.03 | 0.48<br>(1.36)    | 0.46<br>(1.43)    | 0.02  |
| Continuity (proportion of visits with usual provider of care) – mean (SD) | 0.80<br>(0.22)      | 0.84<br>(0.18)   | 0.83<br>(0.19)   | 0.05  | 0.82<br>(0.18)   | 0.80<br>(0.20)   | 0.10  | 0.80<br>(0.22)    | 0.78<br>(0.24)    | 0.09  |

We consider a standardized difference =0.2 be considered a 'small' effect size, 0.5 represents a 'medium' effect size and 0.8 a 'large' effect size.

1  
2  
3  
4  
5  
6  
7  
8  
9  
10  
11  
12  
13  
14  
15  
16  
17  
18  
19  
20  
21  
22  
23  
24  
25  
26  
27  
28  
29  
30  
31  
32  
33  
34  
35  
36  
37  
38  
39  
40  
41  
42  
43  
44  
45  
46  
47

**Table 5.** Crude and adjusted\* odds of enrolment (95% CI) by income, rurality, and previous treatment for mental health or substance use

|                                                                   | Quebec                               |                      |                        |                      | British Columbia                          |                      |                                        |                      |                                                  |                      |
|-------------------------------------------------------------------|--------------------------------------|----------------------|------------------------|----------------------|-------------------------------------------|----------------------|----------------------------------------|----------------------|--------------------------------------------------|----------------------|
|                                                                   | Vulnerable enrolment (targeted) 2003 |                      | General enrolment 2009 |                      | Chronic disease incentive (targeted) 2003 |                      | Complex care incentive (targeted) 2007 |                      | A GP for Me/Attachment initiative (general) 2013 |                      |
|                                                                   | Crude                                | Adjusted             | Crude                  | Adjusted             | Crude                                     | Adjusted             | Crude                                  | Adjusted             | Crude                                            | Adjusted             |
| Neighbourhood income quintile (reference: lowest income quintile) |                                      |                      |                        |                      |                                           |                      |                                        |                      |                                                  |                      |
| 2 <sup>nd</sup> lowest income quintile                            | 1.01<br>(1.00, 1.03)                 | 1.03<br>(1.02, 1.04) | 1.11<br>(1.10, 1.12)   | 1.10<br>(1.09, 1.11) | 1.03<br>(1.00, 1.07)                      | 1.03<br>(0.99, 1.06) | 1.03<br>(0.98, 1.09)                   | 1.02<br>(0.97, 1.08) | 1.09<br>(1.08, 1.10)                             | 1.09<br>(1.08, 1.11) |
| Middle income quintile                                            | 1.00<br>(0.99, 1.01)                 | 1.04<br>(1.03, 1.05) | 1.19<br>(1.18, 1.21)   | 1.18<br>(1.16, 1.19) | 1.07<br>(1.04, 1.11)                      | 1.06<br>(1.03, 1.10) | 1.05<br>(0.99, 1.10)                   | 1.05<br>(0.99, 1.11) | 1.31<br>(1.29, 1.33)                             | 1.33<br>(1.31, 1.34) |
| 2 <sup>nd</sup> highest income quintile                           | 1.00<br>(0.98, 1.01)                 | 1.04<br>(1.03, 1.06) | 1.20<br>(1.19, 1.21)   | 1.18<br>(1.17, 1.20) | 1.09<br>(1.06, 1.13)                      | 1.09<br>(1.05, 1.12) | 1.06<br>(1.00, 1.12)                   | 1.06<br>(1.00, 1.13) | 1.48<br>(1.46, 1.50)                             | 1.50<br>(1.48, 1.52) |
| Highest income quintile                                           | 0.95<br>(0.94, 0.96)                 | 0.95<br>(0.94, 0.96) | 1.23<br>(1.22, 1.24)   | 1.21<br>(1.20, 1.23) | 1.04<br>(1.00, 1.08)                      | 1.03<br>(1.00, 1.07) | 1.14<br>(1.08, 1.21)                   | 1.10<br>(1.04, 1.17) | 1.65<br>(1.62, 1.67)                             | 1.67<br>(1.64, 1.69) |
| Prescription drug coverage indicates income assistance            | NA                                   | NA                   | NA                     | NA                   | 1.00<br>(0.95, 1.04)                      | 1.01<br>(0.97, 1.05) | 0.80<br>(0.75, 0.86)                   | 1.02<br>(0.95, 1.09) | 0.74<br>(0.73, 0.76)                             | 0.76<br>(0.75, 0.78) |
| Urban-rural residence (reference is metropolitan areas)           |                                      |                      |                        |                      |                                           |                      |                                        |                      |                                                  |                      |
| Smaller urban                                                     | 1.43<br>(1.42, 1.44)                 | 1.62<br>(1.60, 1.63) | 0.81<br>(0.80, 0.82)   | 0.76<br>(0.79, 0.80) | 1.16<br>(1.14, 1.19)                      | 1.17<br>(1.14, 1.19) | 1.29<br>(1.23, 1.35)                   | 1.27<br>(1.22, 1.33) | 2.86<br>(2.82, 2.89)                             | 2.82<br>(2.78, 2.85) |
| Rural/remote                                                      | 1.20<br>(1.19, 1.21)                 | 1.37<br>(1.36, 1.39) | 0.94<br>(0.93, 0.95)   | 0.93<br>(0.92, 0.94) | 0.80<br>(0.78, 0.83)                      | 0.80<br>(0.78, 0.83) | 0.63<br>(0.60, 0.67)                   | 0.62<br>(0.58, 0.66) | 1.95<br>(1.92, 1.98)                             | 1.92<br>(1.89, 1.95) |
| Treatment for mental health/substance use                         |                                      |                      |                        |                      |                                           |                      |                                        |                      |                                                  |                      |
| Mental health                                                     | 0.65<br>(0.64, 0.69)                 | 0.94<br>(0.92, 0.96) | N/A                    | N/A                  | 0.94<br>(0.91, 0.98)                      | 0.98<br>(0.94, 1.02) | 0.88<br>(0.83, 0.93)                   | 0.87<br>(0.82, 0.93) | 1.14<br>(1.13, 1.16)                             | 1.14<br>(1.13, 1.16) |
| Substance use                                                     | 0.57<br>(0.55, 0.59)                 | 0.60<br>(0.58, 0.63) | N/A                    | N/A                  | 0.67<br>(0.61, 0.75)                      | 0.72<br>(0.65, 0.80) | 0.62<br>(0.56, 0.70)                   | 0.64<br>(0.56, 0.72) | 0.61<br>(0.59, 0.62)                             | 0.61<br>(0.59, 0.63) |

\*Multivariable models used to generate adjusted odds ratios include age, sex, and Elixhauser comorbidity index



**Table 6.** Odds of enrolment (95% CI) by health care use in the year prior to enrolment program

|                                                               | Quebec                                      |                      |                               |                      | British Columbia                                 |                      |                                               |                      |                                                         |                      |
|---------------------------------------------------------------|---------------------------------------------|----------------------|-------------------------------|----------------------|--------------------------------------------------|----------------------|-----------------------------------------------|----------------------|---------------------------------------------------------|----------------------|
|                                                               | <b>Vulnerable enrolment (targeted) 2003</b> |                      | <b>General enrolment 2009</b> |                      | <b>Chronic disease incentive (targeted) 2003</b> |                      | <b>Complex care incentive (targeted) 2007</b> |                      | <b>A GP for Me/Attachment initiative (general) 2013</b> |                      |
|                                                               | Crude                                       | Adjusted             |                               |                      | Crude                                            | Adjusted             | Crude                                         | Adjusted             | Crude                                                   | Adjusted             |
| Number of primary care visits                                 | 1.05<br>(1.05, 1.05)                        | 1.03<br>(1.03, 1.03) | 1.08<br>(1.08, 1.08)          | 1.06<br>(1.06, 1.06) | 1.00<br>(1.00, 1.00)                             | 1.00<br>(1.00, 1.01) | 1.02<br>(1.02, 1.02)                          | 1.01<br>(1.01, 1.01) | 0.99<br>(0.99, 0.99)                                    | 0.98<br>(0.98, 0.98) |
| Number of ED visits                                           | 1.04<br>(1.04, 1.04)                        | 1.04<br>(1.04, 1.04) | 1.005<br>(1.001, 1.009)       | 0.99<br>(0.99, 0.99) | 0.95<br>(0.94, 0.95)                             | 0.96<br>(0.95, 0.97) | 0.99<br>(0.98, 1.00)                          | 0.98<br>(0.97, 0.98) | 1.01<br>(1.01, 1.01)                                    | 1.00<br>(1.00, 1.00) |
| Continuity (proportion of visits with usual provider of care) | 1.13<br>(1.13, 1.14)                        | 1.13<br>(1.13, 1.13) | 1.12<br>(1.12, 1.12)          | 1.11<br>(1.11, 1.11) | 1.03<br>(1.02, 1.03)                             | 1.02<br>(1.02, 1.03) | 1.06<br>(1.05, 1.07)                          | 1.04<br>(1.03, 1.05) | 1.04<br>(1.04, 1.04)                                    | 1.03<br>(1.03, 1.04) |

\* Multivariable models used to generate adjusted odds ratios include age, sex, and Elixhauser comorbidity index

1  
2  
3  
4  
5  
6  
7  
8  
9  
10  
11  
12  
13  
14  
15  
16  
17  
18  
19  
20  
21  
22  
23  
24  
25  
26  
27  
28  
29  
30  
31  
32  
33  
34  
35  
36  
37  
38  
39  
40  
41  
42  
43  
44  
45  
46  
47

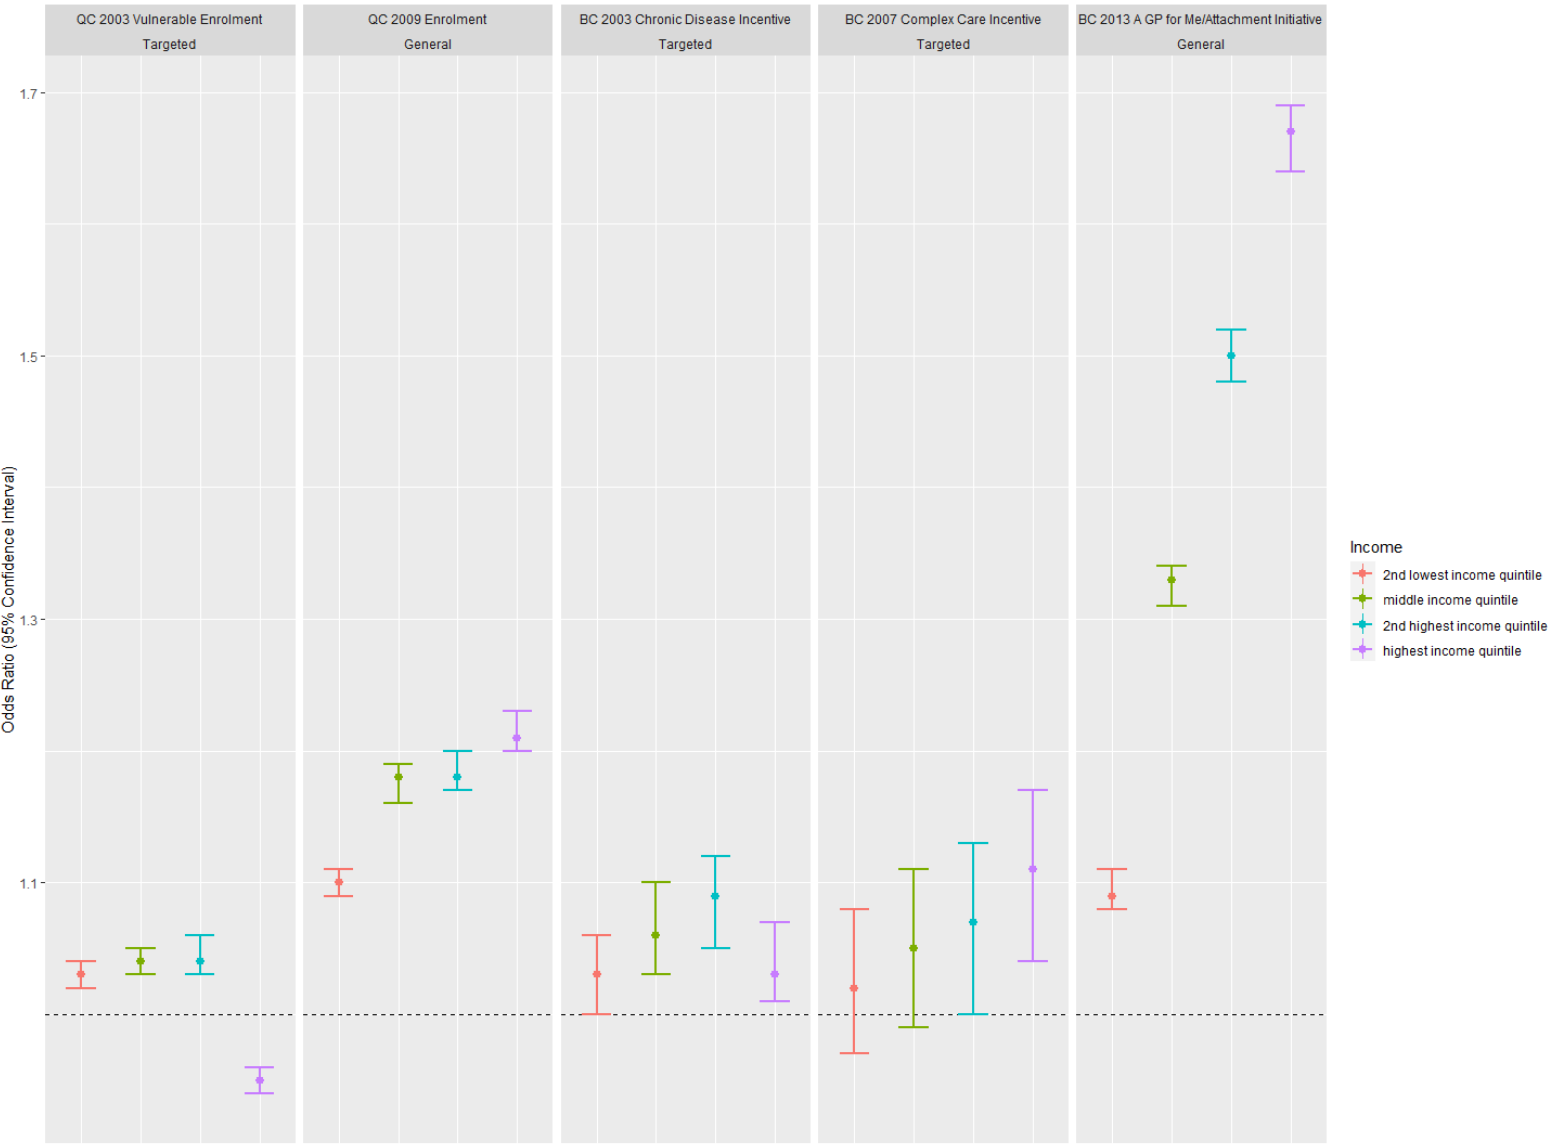

**Figure 1.** Odds of enrolment by program and neighbourhood income quintile. Adjusted for age, sex, and Elixhauser comorbidity index.

## References

1. Haggerty JL, Reid RJ, Freeman GK, Starfield BH, Adair CE, McKendry R. Continuity of care: a multidisciplinary review. *BMJ*. 2003;327(7425):1219-21.
2. Tiagi R, Chechulin Y. The effect of rostering with a patient enrolment model on emergency department utilization. *Healthc Policy*. 2014;9(4):105-21.
3. Bodenheimer T, Ghorob A, Willard-Grace R, Grumbach K. The 10 building blocks of high-performing primary care. *Ann Fam Med*. 2014;12(2):166-71.
4. Roland M, Guthrie B, Thomé DC. Primary Medical Care in the United Kingdom. *The Journal of the American Board of Family Medicine*. 2012;25(Suppl 1):S6-S11.
5. Dahrouge S, Hogg W, Russell G, Geneau R, Kristjansson E, Muldoon L, et al. The Comparison of Models of Primary Care in Ontario (COMP-PC) study: methodology of a multifaceted cross-sectional practice-based study. *Open Med*. 2009;3(3):e149-64.
6. The College of Family Physicians of Canada. Patient Rostering In Family Practice Best Advice. 2012.
7. Alana Godin AM. The value of data: Identifying patient and community needs to inform primary care networks. *BCM J*. 2019;61(6):261-2.
8. Sancton K, Sloss L, Berkowitz J, Strydom N, McCracken R. Low-acuity presentations to the emergency department. Reasons for and access to other health care providers before presentation. 2018;64(8):e354-e60.
9. Dahrouge S, Hogg W, Muggah E, Schrecker T. Equity of primary care service delivery for low income "sicker" adults across 10 OECD countries. *Int J Equity Health*. 2018;17(1):182.
10. Corscadden L, Levesque JF, Lewis V, Strumpf E, Breton M, Russell G. Factors associated with multiple barriers to access to primary care: an international analysis. *Int J Equity Health*. 2018;17(1):28.
11. Sibley LM, Weiner JP. An evaluation of access to health care services along the rural-urban continuum in Canada. *Bmc Health Serv Res*. 2011;11:20.
12. Kaufman EA, McDonnell MG, Cristofalo MA, Ries RK. Exploring barriers to primary care for patients with severe mental illness: frontline patient and provider accounts. *Issues Ment Health Nurs*. 2012;33(3):172-80.
13. Knaak S, Mantler E, Szeto A. Mental illness-related stigma in healthcare: Barriers to access and care and evidence-based solutions. *Healthc Manage Forum*. 2017;30(2):111-6.
14. Steele LS, Durbin A, Sibley LM, Glazier R. Inclusion of persons with mental illness in patient-centred medical homes: cross-sectional findings from Ontario, Canada. *Open Med*. 2013;7(1):e9-20.
15. Starfield B, Shi L. Policy relevant determinants of health: an international perspective. *Health Policy*. 2002;60(3):201-18.
16. Shi L, Macinko J, Starfield B, Politzer R, Wulu J, Xu J. Primary care, social inequalities and all-cause, heart disease and cancer mortality in US counties: a comparison between urban and non-urban areas. *Public Health*. 2005;119(8):699-710.
17. Glazier RH. Balancing equity issues in health systems: perspectives of primary healthcare. *Healthc Pap*. 2007;8 Spec No:35-45.
18. Roberts KC, Rao DP, Bennett TL, Loukine L, Jayaraman GC. Prevalence and patterns of chronic disease multimorbidity and associated determinants in Canada. *Health Promot Chronic Dis Prev Can*. 2015;35(6):87-94.

19. Lee DS, Chiu M, Manuel DG, Tu K, Wang X, Austin PC, et al. Trends in risk factors for cardiovascular disease in Canada: temporal, socio-demographic and geographic factors. *CMAJ*. 2009;181(3-4):E55-66.

20. Olah ME, Gaisano G, Hwang SW. The effect of socioeconomic status on access to primary care: an audit study. *CMAJ*. 2013;185(6):E263-9.

21. Ellis RP. Creaming, skimping and dumping: provider competition on the intensive and extensive margins. *J Health Econ*. 1998;17(5):537-55.

22. Eggleston K. Risk Selection and Optimal Health Insurance-Provider Payment Systems. *The Journal of Risk and Insurance*. 2000;67(2):173-96.

23. Breton M, Brousselle A, Boivin A, Roberge D, Pineault R, Berbiche D. Who gets a family physician through centralized waiting lists? *BMC Family Parctice*. 2015;16(10).

24. Borgès Da Silva R, Fiset-Laniel, J., Hazra, A., Strumpf, E. C. Analyse d’une politique de santé visant l’amélioration de l’accès à un médecin de famille: Les guichets d’accès pour la clientèle orpheline au Québec. *CIRANO* 2015;2015RP-04.

25. British Columbia Ministry of Health [creator] (2015): Medical Services Plan (MSP) Payment Information File. V2. Population Data BC [publisher]. Data Extract. MOH (2018). <http://www.popdata.bc.ca/data>.

26. British Columbia Ministry of Health [creator] (2015): Consolidation File (MSP Registration & Premium Billing). V2. Population Data BC [publisher]. Data Extract. MOH (2018). <http://www.popdata.bc.ca/data>.

27. Canadian Institute for Health Information [creator] (2015): Discharge Abstract Database (Hospital Separations). V2. Population Data BC [publisher]. Data Extract. MOH (2018). <http://www.popdata.bc.ca/data>.

28. BC Vital Statistics Agency [creator] (2015): Vital Statistics Deaths. V2. Population Data BC [publisher]. Data Extract BC Vital Statistics Agency (2018). <http://www.popdata.bc.ca/data>.

29. Statistics Canada. Statistical Area Classification (SAC)[Internet]. 2018. Available from: <https://www150.statcan.gc.ca/n1/pub/92-195-x/2011001/other-autre/sac-css/sac-css-eng.htm>.

30. Olah ME, Gaisano G, Hwang SW. The effect of socioeconomic status on access to primary care: an audit study. *Canadian Medical Association Journal*. 2013;185(6):E263-E9.

31. McGrail K, Lavergne MR, Ahuja M, Yung S, Peterson S. Patient and primary care physician characteristics associated with billing incentives for chronic diseases in British Columbia: a retrospective cohort study. *CMAJ Open*. 2020;8(2):E319-E27.

32. Régie de l’assurance maladie, Ministère de la Santé et des Services sociaux. Entente particulière GMF intégrant les clientèles vulnérables. 2003.

33. Régie de l’assurance maladie, Ministère de la Santé et des Services sociaux. Inscription générale de la clientèle: E.P. – Services de médecine de famille, de prise en charge et de suivi de la clientèle [Internet]. 2008. Available from: <https://www.ramq.gouv.qc.ca/sitecollectiondocuments/professionnels/infolettres/2008/com145-8.pdf>.

34. McCarthy D. Revised complex care management fee launched. *BCMj*. 2008;50(1):40-GPSC.

35. Cavers B. Attachment: How “A GP for Me” will help improve BC’s primary care system. *BCMj*. 2013;55(3):160-GPSC.

1  
2  
3 36. Régie de l'assurance maladie, Ministère de la Santé et des Services sociaux.  
4 Amendement no 116 et Lettre d'entente no 228 [Internet]. 2010. Available from:  
5 [https://www.ramq.gouv.qc.ca/SiteCollectionDocuments/professionnels/infolettres/2010/](https://www.ramq.gouv.qc.ca/SiteCollectionDocuments/professionnels/infolettres/2010/info124-0.pdf)  
6 [info124-0.pdf](https://www.ramq.gouv.qc.ca/SiteCollectionDocuments/professionnels/infolettres/2010/info124-0.pdf).  
7  
8  
9  
10  
11  
12  
13  
14  
15  
16  
17  
18  
19  
20  
21  
22  
23  
24  
25  
26  
27  
28  
29  
30  
31  
32  
33  
34  
35  
36  
37  
38  
39  
40  
41  
42  
43  
44  
45  
46  
47  
48  
49  
50  
51  
52  
53  
54  
55  
56  
57  
58  
59  
60

Confidential
